# Supplementary material for: Validation of a Deep Learning Model for Detecting Chest Pathologies from Digital Chest Radiographs
Source: MDPI journal article supplement (doi:10.3390/diagnostics13030557), 2023-02-02
Supplement: s1 [file s1]

# **Validation of a deep learning model for detecting chest pathologies from digital chest radiographs**

## SUPPLEMENTARY DATA

|                |        | AUROC [95% CI]         |                         | Sensitivity [95% CI]     |                         | Specificity [95% CI]    |                          |
|----------------|--------|------------------------|-------------------------|--------------------------|-------------------------|-------------------------|--------------------------|
| Hospital       | Reader | Unaided Session        | Aided Session           | Unaided Session          | Aided Session           | Unaided Session         | Aided Session            |
| A              | R1     | 0.843<br>[0.812,0.874] | 0.861<br>[0.831, 0.888] | 0.723<br>[0.662,0.785]   | 0.821<br>[0.767,0.871]  | 0.963<br>[0.949, 0.975] | 0.9003<br>[0.878, 0.921] |
|                | R2     | 0.881<br>[0.854,0.908] | 0.901<br>[0.878, 0.923] | 0.802<br>[0.749, 0.855]  | 0.915<br>[0.876, 0.950] | 0.959<br>[0.945, 0.973] | 0.888<br>[0.864, 0.909]  |
|                | R3     | 0.835<br>[0.806,0.867] | 0.869<br>[0.839,0.896]  | 0.787<br>[0.732, 0.843]  | 0.815<br>[0.759, 0.866] | 0.884<br>[0.859, 0.906] | 0.923<br>[0.905, 0.941]  |
| B              | R1     | 0.884<br>[0.819,0.942] | 0.885<br>[0.818,0.944]  | 0.7914<br>[0.667, 0.903] | 0.816<br>[0.688,0.927]  | 0.977<br>[0.948, 1.000] | 0.953<br>[0.912, 0.991]  |
|                | R2     | 0.881<br>[0.813,0.942] | 0.923<br>[0.870, 0.969] | 0.798<br>[0.667, 0.915]  | 0.902<br>[0.806, 0.977] | 0.964<br>[0.926, 0.992] | 0.945<br>[0.902, 0.983]  |
|                | R3     | 0.600<br>[0.532,0.676] | 0.872<br>[0.807, 0.928] | 0.258<br>[0.128, 0.395]  | 0.853<br>[0.738, 0.948] | 0.943<br>[0.901, 0.982] | 0.892<br>[0.835, 0.945]  |
| Entire dataset | R1     | 0.849<br>[0.821,0.876] | 0.864<br>[0.838, 0.889] | 0.734<br>[0.678, 0.788]  | 0.820<br>[0.771, 0.866] | 0.965<br>[0.952, 0.976] | 0.908<br>[0.888, 0.926]  |
|                | R2     | 0.881<br>[0.855,0.906] | 0.904<br>[0.883, 0.923] | 0.801<br>[0.751, 0.849]  | 0.913<br>[0.877, 0.946] | 0.960<br>[0.947, 0.973] | 0.895<br>[0.875, 0.915]  |
|                | R3     | 0.796<br>[0.767,0.826] | 0.870<br>[0.844, 0.895] | 0.701<br>[0.647, 0.757]  | 0.821<br>[0.771, 0.867] | 0.892<br>[0.870, 0.912] | 0.919<br>[0.901, 0.937]  |

**Supplementary Table S1:** Aggregate performance of the human readers in session 1 (Unaided Session) and session 2 (Aided Session) across all categories in external validation tests.

| Reader               | Average time $\pm$ SD to read one scan (in seconds) |                   | p-value |
|----------------------|-----------------------------------------------------|-------------------|---------|
|                      | Unaided session                                     | Aided session     |         |
| R1                   | 9.99 $\pm$ 15.07                                    | 6.16 $\pm$ 4.4    | <0.01   |
| R2                   | 11.18 $\pm$ 12.91                                   | 9.04 $\pm$ 3.5    | 0.044   |
| R3                   | 19.13 $\pm$ 37.67                                   | 16.63 $\pm$ 57.51 | <0.01   |
| Average (R1, R2, R3) | 13.43 $\pm$ 24.92                                   | 10.61 $\pm$ 33.66 | <0.01   |

**Supplementary Table S2:** Analysis of chest radiograph interpretation time by readers during unaided and aided reading sessions.
